# Supplementary material
Source: publisher site journal article supplement (https://cdn.jamanetwork.com/ama/content_public/journal/jamanetworkopen/939135/zoi230329supp4_prod_1682436984.30774.pdf)
Supplement: Supplementary file [file zoi230329supp4_prod_1682436984.30774.pdf]

## Data Sharing Statement

Mostafavi. Efficacy and Safety of a Protein-Based SARS-CoV-2 Vaccine. *JAMA Netw Open*. Published May 03, 2023. doi:10.1001/jamanetworkopen.2023.10302

### Data

**Data available:** Yes

**Data types:** Deidentified participant data

**How to access data:** Deidentified participant data are available with permission of Pasteur Institute of Iran from the corresponding author (Dr Alireza Biglari, email: [Biglari63@hotmail.com](mailto:Biglari63@hotmail.com)) upon reasonable request.

**When available:** With publication

### Supporting Documents

**Document types:** None

### Additional Information

**Who can access the data:** Researchers whose proposed use of the data has been approved

**Types of analyses:** For any purpose

**Mechanisms of data availability:** With investigator support and after approval of a proposal
